# Supplementary material for: An urgent call for more ambitious ocean literacy strategies in marine protected areas: a collaboration project with small-scale fishers as a case study
Source: Frontiers journal article supplement (doi:10.3389/fmars.2024.1320515), 2024-01-29
Supplement: Table_1.pdf [file Table_1.pdf]

## *Supplementary Material*

# **An Urgent Call for More Ambitious Ocean Literacy Strategies in Marine Protected Areas: a Collaboration Project with Small-scale Fishers as a Case Study**

**Janire Salazar\***, Sílvia Gómez, Begoña Vendrell, Miroslav Pulgar, Núria Viladrich, Stefano Ambroso, Patricia Baena, Andreu Santín, Maria Montseny, Marina Biel-Cabanelas, Josep-Maria Gili

\* **Correspondence:** Janire Salazar

[jsalazar@icm.csic.es](mailto:jsalazar@icm.csic.es), [janireslzar@gmail.com](mailto:janireslzar@gmail.com)

## **1 Supplementary Tables and Figures**

| Date       | Event                                                                                                                                                                                                                            | Autorship/Hosted by                            |
|------------|----------------------------------------------------------------------------------------------------------------------------------------------------------------------------------------------------------------------------------|------------------------------------------------|
| 1974       | National Marine Education Conference on The University of Rhode Island campus in Kingston, Rhode Island. The meeting was aimed at all segments of the education community that had some interest in the “World of Water”.        | University of Rhode Island                     |
| 1985       | National Marine Educators Association (NMEA) forms                                                                                                                                                                               | NMEA                                           |
| 1990 - ... | Various researchers showed the cost-effectiveness and fairness to indigenous peoples territorial rights of integrating LEK into development and conservation projects (also referred as Indigenous technological knowledge, ITK) | Tiltilola (1990), based on Aswani et al., 2018 |

## Supplementary Material

|      |                                                                                                                                                                                                                                                                                                                                    |                                                                                                                                                                                                                           |
|------|------------------------------------------------------------------------------------------------------------------------------------------------------------------------------------------------------------------------------------------------------------------------------------------------------------------------------------|---------------------------------------------------------------------------------------------------------------------------------------------------------------------------------------------------------------------------|
| 2000 | First online onboard journal from the Institut de Ciències del Mar (ICM-CSIC, Barcelona, Spain)                                                                                                                                                                                                                                    | ICM-CSIC                                                                                                                                                                                                                  |
| 2002 | Oceans for Life conference: Production of a guide with detailed ocean content for teaching (mainly geography): <i>Oceans for life: A scope and sequence for geography education K-12</i>                                                                                                                                           | National Geographic Society (NGS) and College of Exploration (CoE)                                                                                                                                                        |
| 2002 | First publication about LEK related to marine knowledge, in Equador                                                                                                                                                                                                                                                                | Guest<br>(based on Aswani et al., 2018)                                                                                                                                                                                   |
| 2003 | Role of LEK in ecosystem management                                                                                                                                                                                                                                                                                                | Gadgil et al., 2003. Exploring the role of local ecological knowledge in ecosystem management: three case studies. <i>Navigating social-ecological systems: building resilience for complexity and change</i> , 189, 209. |
| 2004 | The term ‘Ocean Literacy’ was originally coined in 2004 by a group of ocean scientists and education professionals in the USA, who recognised a lack of ocean-related subjects in formal education and developed a comprehensive framework to encourage the inclusion of ocean sciences into national and state standard education | UNESCO, 2018                                                                                                                                                                                                              |
| 2004 | “ICM Divulga”, an ICM-CSIC’s institutional platform for marine knowledge outreach and education purposes is created                                                                                                                                                                                                                | ICM-CSIC                                                                                                                                                                                                                  |

|      |                                                                                                                                                                                                                                                                                                 |                                                                                                                                                                                                                                    |
|------|-------------------------------------------------------------------------------------------------------------------------------------------------------------------------------------------------------------------------------------------------------------------------------------------------|------------------------------------------------------------------------------------------------------------------------------------------------------------------------------------------------------------------------------------|
| 2005 | Production of an Ocean Literacy (OL) guide for teachers from kindergarten to high school to use ocean content. The guide contained a definition and a set of seven principles and 45 concepts: <i>Ocean Literacy: The essential principles and fundamental concepts of ocean sciences K-12*</i> | CoE, NGS, National Marine Educators Association (NMEA), National Oceanic and Atmospheric Administration (NOAA) Office of Education, Lawrence Hall of Science in California, Centers for Ocean Science Education Excellence (COSEE) |
| 2006 | LEK study in Kenya                                                                                                                                                                                                                                                                              | Crona (based on Aswani et al., 2018)                                                                                                                                                                                               |
| 2007 | International Pacific Marine Educators conference: International Pacific Marine Educators Network (IPMEN) forms                                                                                                                                                                                 | IPMEN                                                                                                                                                                                                                              |
| 2007 | <i>The Marine education white paper</i> is published                                                                                                                                                                                                                                            | Taiwan Ministry of Education                                                                                                                                                                                                       |
| 2008 | Ocean Literacy guide is published in Japanese                                                                                                                                                                                                                                                   | NMEA                                                                                                                                                                                                                               |
| 2008 | LEK study in Santha (India)                                                                                                                                                                                                                                                                     | Santha (based on Aswani et al., 2018)                                                                                                                                                                                              |
| 2008 | Role of LEK and the management of MPA (case study in Brazil)                                                                                                                                                                                                                                    | Gerhardinger et al., 2009. Local ecological knowledge and the management of marine protected areas in Brazil. <i>Ocean &amp; Coastal Management</i> , 52(3-4), 154-165                                                             |
| 2009 | Production of the “Scope and Sequence” for OL                                                                                                                                                                                                                                                   | NMEA                                                                                                                                                                                                                               |
| 2009 | US-based Great Lakes Literacy Guide published                                                                                                                                                                                                                                                   | American Geophysical Union                                                                                                                                                                                                         |
| 2010 | NMEA special report #3: The ocean literacy campaign published                                                                                                                                                                                                                                   | NMEA                                                                                                                                                                                                                               |
| 2010 | “El Mar a Fons” project (The Sea in Depth) is created in the                                                                                                                                                                                                                                    | ICM-CSIC                                                                                                                                                                                                                           |

Supplementary Material

|      |                                                                                                                                                             |                                                         |
|------|-------------------------------------------------------------------------------------------------------------------------------------------------------------|---------------------------------------------------------|
|      | ICM-CSIC with the aim to provide educational and outreach resources and assistance for both formal and non-formal education                                 |                                                         |
| 2010 | The Center for Ocean Sciences Education Excellence of China (COSEE China) forms                                                                             | COSEE China                                             |
| 2010 | Ocean Literacy Guide published in Chinese                                                                                                                   | NMEA                                                    |
| 2011 | Ocean Literacy Guide published in Portuguese                                                                                                                | NMEA                                                    |
| 2011 | LEK study in USA                                                                                                                                            | Ainsworth (based on Aswani et al., 2018)                |
| 2012 | European Marine Science Educators Association (EMSEA) forms; Conference on ocean literacy in Bruges, Belgium; ocean literacy campaign begins in Bangladesh. | EMSEA                                                   |
| 2012 | The citizen science project “Observadores del Mar” (Sea Watchers) is created in the ICM-CSIC for connecting marine researchers and citizenship              | ICM-CSIC                                                |
| 2013 | Ocean Literacy Guide version 2 published                                                                                                                    | NMEA                                                    |
| 2013 | Sign of the Galway Statement on Atlantic Ocean cooperation                                                                                                  | Canada, EU and the United States                        |
| 2013 | Canadian Network for Ocean Education (CaNOE) forms                                                                                                          | CaNOE                                                   |
| 2014 | The vision statement for transatlantic ocean literacy is published                                                                                          | Organizers of the Transatlantic Ocean Literacy Workshop |
| 2014 | ICM-CSIC representation in                                                                                                                                  | ECSA                                                    |

|      |                                                                                                                                                                                                      |                                                  |
|------|------------------------------------------------------------------------------------------------------------------------------------------------------------------------------------------------------|--------------------------------------------------|
|      | the European Citizen Science Association (ECSA)                                                                                                                                                      |                                                  |
| 2014 | First International Marine Science Communication conference                                                                                                                                          | CIIMAR, EMBCP and Ciência Viva                   |
| 2015 | Ocean Literacy/Next Generation Science Standards alignment published                                                                                                                                 | NMEA                                             |
| 2015 | Sea Change project, a 3-year long european project with 17 european partners is launched to foster Ocean Literacy in citizenship                                                                     | Funded by the EU                                 |
| 2015 | ResponSEAbLe project                                                                                                                                                                                 | Funded by the EU                                 |
| 2015 | All-Atlantic Ocean Research Alliance emerges                                                                                                                                                         | All-Atlantic Ocean Research Alliance             |
| 2015 | Asia Marine Educators Association (AMEA) forms                                                                                                                                                       | AMEA                                             |
| 2015 | LEK study in Solomon islands                                                                                                                                                                         | Aswani and Albert (based on Aswani et al., 2018) |
| 2015 | LEK study in Nicobar (India)                                                                                                                                                                         | Patankar et al. (based on Aswani et al., 2018)   |
| 2015 | EMSEA-Med forms                                                                                                                                                                                      | EMSEA-Med                                        |
| 2016 | CommOCEAN 2016                                                                                                                                                                                       | Organizers of CommOCEAN                          |
| 2016 | The project “Petits Oceanògrafs” (Little Oceanographers) is created in the ICM-CSIC as an institutional annual opportunity for schools to connect with marine researchers from different specialties | ICM-CSIC                                         |
| 2016 | Natusfera: A platform to integrate citizen science approaches for monitoring marine ecosystems is created by the Ecological and Forestry                                                             | ICM-CSIC                                         |

## Supplementary Material

|      |                                                                                                                                                                                                                                |                                                                                                                             |
|------|--------------------------------------------------------------------------------------------------------------------------------------------------------------------------------------------------------------------------------|-----------------------------------------------------------------------------------------------------------------------------|
|      | Applications Research Centre (CREAF) and the ICM-CSIC                                                                                                                                                                          |                                                                                                                             |
| 2016 | 1st Global Ocean Science Workshop                                                                                                                                                                                              | UNESCO                                                                                                                      |
| 2017 | Ocean Literacy for All conference                                                                                                                                                                                              | UNESCO                                                                                                                      |
| 2017 | Mediterranean Sea Literacy published                                                                                                                                                                                           | EMSEA                                                                                                                       |
| 2017 | REEDUCAMAR emerges as a repository to put together spanish OL efforts and resources, with several ICM-CSIC's resources and efforts on OL                                                                                       | Spanish government                                                                                                          |
| 2017 | Korean Ocean Literacy Guide published                                                                                                                                                                                          | NMEA                                                                                                                        |
| 2017 | <i>Ocean Literacy for all: A toolkit</i> published                                                                                                                                                                             | UNESCO                                                                                                                      |
| 2018 | African Ocean Literacy Network forms                                                                                                                                                                                           | African Ocean Literacy Network                                                                                              |
| 2018 | Ocean Literacy Italia forms                                                                                                                                                                                                    | Ocean Literacy Italia                                                                                                       |
| 2018 | CommOCEAN 2018                                                                                                                                                                                                                 | Organizers of CommOCEAN                                                                                                     |
| 2018 | Global trends of LEK and future implications                                                                                                                                                                                   | Aswani et al., 2018. Global trends of local ecological knowledge and future implications. <i>PloS one</i> , 13(4), e0195440 |
| 2018 | “Espai Mediterrani” is created in Barcelona (Spain) with the participation of the ICM-CSIC and local civil associations around 3 objectives (territory and marine culture, sustainability and social justice and Ocean Health) | Espai Mediterrani                                                                                                           |
| 2019 | <i>Exemplary practices in marine</i>                                                                                                                                                                                           | Fauville et al., 2019                                                                                                       |

|      |                                                                                                                                                                                                                   |                                                     |
|------|-------------------------------------------------------------------------------------------------------------------------------------------------------------------------------------------------------------------|-----------------------------------------------------|
|      | <i>science education: A resource for practitioners and researchers</i> published                                                                                                                                  |                                                     |
| 2019 | RELATO Océano forms                                                                                                                                                                                               | RELATO                                              |
| 2020 | Ocean Literacy Guide version 3 published                                                                                                                                                                          | NMEA                                                |
| 2020 | Virtual Ocean Literacy Summit                                                                                                                                                                                     | UNESCO's Intergovernmental Oceanographic Commission |
| 2020 | EU4Ocean Coalition forms with european associations including the ICM-CSIC as a founding member                                                                                                                   | European Maritime Forum                             |
| 2020 | The ICM-CSIC launches the Network of Marine Schools with first connections to Barcelona's and Catalan's government for embedding ocean knowledge in formal education                                              | Espai Mediterani                                    |
| 2021 | Launch of the Decade of Ocean Science for Sustainable Development (2021-2030)                                                                                                                                     | United Nations                                      |
| 2022 | The ICM-CSIC signs the Charter on Education committing to Ocean Literacy during the EMSEA conference                                                                                                              | EMSEA                                               |
| 2023 | LEK study in Cap de Creus MPA                                                                                                                                                                                     | Biel-Cabanelas et al., 2023                         |
| 2023 | New framework for Ocean Literacy with 10 dimensions: knowledge, awareness, attitude, behavior, activism, communication, emotional connections, access and experience, adaptive capacity & trust and transparency. | McKinley et al., 2023                               |

\* Later referred as the "Ocean Literacy guide"

## Supplementary Material

**Supplementary Table 1.** Chronology of Ocean Literacy (globals in blue and locals in orange) and LEK efforts (in green) through time.

### I. About You:

|                                                                                                                       |                              |                             |
|-----------------------------------------------------------------------------------------------------------------------|------------------------------|-----------------------------|
| 1] Interview #                                                                                                        |                              |                             |
| 2] Date:                                                                                                              | 3] Place:                    |                             |
| 4] Interviewer:                                                                                                       |                              |                             |
| 5] Recording:                                                                                                         | <input type="checkbox"/> Yes | <input type="checkbox"/> No |
| 6] File code:                                                                                                         |                              |                             |
| 7] Name and surname                                                                                                   |                              |                             |
| 8] Age                                                                                                                | 9] Sex:                      |                             |
| 10] Start of professional career (year)                                                                               |                              |                             |
| 11] in the case of being a fishing skipper, indicate whether you are also the owner (and the number of fishing units) |                              |                             |

| BOAT     |  |
|----------|--|
| 12] Name |  |

|                              |  |                                          |  |
|------------------------------|--|------------------------------------------|--|
| 13] Length (m)               |  | 14] Tonnage (TRB or GT)                  |  |
| 15] Power (CV or kW)         |  | 16] Material (wood, fiberglass...)       |  |
| 17] Year of construction     |  | 18] Hull material (wood, steel, plastic) |  |
| 19] Crew number <sup>1</sup> |  | 20] Number of sailors                    |  |
| 21] Fishing gear used        |  | Main gear                                |  |
|                              |  | Gear 2                                   |  |
|                              |  | Gear 3                                   |  |
|                              |  | Gear 4                                   |  |

1) How many years have you been fishing in the Cap de Creus area?

|              |  |
|--------------|--|
| More than 30 |  |
| 20-30        |  |
| 10-20        |  |
| 5-10         |  |

---

<sup>1</sup> Including ship's captain

## Supplementary Material

|                |  |
|----------------|--|
| Less<br>than 5 |  |
|----------------|--|

2) To which fishing association do you belong?

|                        |  |
|------------------------|--|
| Roses                  |  |
| Cadaqués               |  |
| El Port de la<br>Selva |  |
| Llançà                 |  |

3) Have you always been a member of the current fishing association?    Yes                      No

(If not, specify in which other fishing association you have worked: \_\_\_\_\_)

4) Do you fish year-round?    Yes                      No

If not, indicate which months of the year you fish (check them off)

|          |  |           |  |
|----------|--|-----------|--|
| January  |  | July      |  |
| February |  | August    |  |
| March    |  | September |  |
| April    |  | October   |  |
| May      |  | November  |  |
| June     |  | December  |  |

- 5) Which month or months of the year do you usually set your fishing gear most frequently?  
(Check them off)

|          |  |           |  |
|----------|--|-----------|--|
| January  |  | July      |  |
| February |  | August    |  |
| March    |  | September |  |
| April    |  | October   |  |
| May      |  | November  |  |
| June     |  | December  |  |

- 6) How often do you typically lift your fishing gear?

|                       |  |
|-----------------------|--|
| More than once a week |  |
| Weekly                |  |
| Every two week        |  |
| Monthly               |  |

- 7) Is fishing your only source of income?    Yes                      No  
If not, what do you combine with fishing?

|  |
|--|
|  |
|--|

- 8) What are the top 6 main “target” species you focus on? Please rank them from most to least important:

|    |
|----|
| 1. |
| 2. |

Supplementary Material

|    |
|----|
| 3. |
| 4. |
| 5. |
| 6. |

9) Why do you believe these species are important?

|  |
|--|
|  |
|--|

10) Which of the following adjectives do you identify with the most as a fisher?

|              |  |
|--------------|--|
| fair         |  |
| respectful   |  |
| correct      |  |
| exploitative |  |

|                        |  |
|------------------------|--|
| activist               |  |
| sustainable            |  |
| Other (write it/them): |  |

11) What impact do you think you have on the seabed?

|           |  |
|-----------|--|
| High      |  |
| Moderate  |  |
| Low       |  |
| No impact |  |

12) Would you participate in projects with biologists again?    Yes                      No

13) Have you talked about the gorgonian projects with people?    Yes                      No

14) If yes, in what areas? (Check the options you consider)

|                                 |  |
|---------------------------------|--|
| Family                          |  |
| Friends                         |  |
| Tourists                        |  |
| Fishing association             |  |
| Fishers from other associations |  |
| Recreational fishers            |  |
| Divers                          |  |
| Natural Park personnel          |  |

## Supplementary Material

|                          |  |
|--------------------------|--|
| Administration personnel |  |
| Other biologists         |  |
| Other (write it/them):   |  |

15) From the previous areas, which are the top 2 areas where you talk the most?

1. \_\_\_\_\_
2. \_\_\_\_\_

16) With which individuals/entities/groups have you specifically talked about the project?

(Provide at least 10 names, or more if possible; they can be family members, friends, summer residents, tourists, other fishers from the association, fishers from other associations, divers, local people).

|     |
|-----|
| 1.  |
| 2.  |
| 3.  |
| 4.  |
| 5.  |
| 6.  |
| 7.  |
| 8.  |
| 9.  |
| 10. |

|  |
|--|
|  |
|  |
|  |
|  |
|  |

**II. Regarding the people you mentioned in the previous question:**

**Put the person’s name here and respond about this person:** \_\_\_\_\_

1) What age would you place this person in?:

|          |  |
|----------|--|
| 1 to 10  |  |
| 11 to 20 |  |
| 21 to 30 |  |
| 31 to 40 |  |
| 41 to 50 |  |
| 51 to 60 |  |
| 61 to 70 |  |
| 71 to 80 |  |
| Over 80  |  |

2) Is this person male or female?

|      |  |
|------|--|
| Male |  |
|------|--|

## Supplementary Material

|        |  |
|--------|--|
| Female |  |
|--------|--|

3) Where does this person live, regularly?

|                               |  |
|-------------------------------|--|
| El Port de la Selva           |  |
| Selva de Mar                  |  |
| La Vall                       |  |
| Llançà                        |  |
| Cadaqués                      |  |
| Roses                         |  |
| Colera                        |  |
| Other (write the place name): |  |
| I don't know                  |  |

4) How many years, approximately, have you known this person?

|              |  |
|--------------|--|
| More than 30 |  |
| 20-30        |  |
| 10-20        |  |
| 5-10         |  |
| Less than 5  |  |

5) How close do you feel to this person?

|                  |  |
|------------------|--|
| Not close at all |  |
| Not very close   |  |
| Fairly close     |  |
| Close            |  |
| Very close       |  |

6) Which category best describes the frequency of contact with this person?

|               |  |
|---------------|--|
| Every day     |  |
| Twice a week  |  |
| Once a week   |  |
| Twice a month |  |
| Once a month  |  |
| Twice a year  |  |
| Once a year   |  |

7) How do you typically contact this person (choose one, the most preferred)?

|                   |  |
|-------------------|--|
| In person         |  |
| By phone, talkint |  |

## Supplementary Material

|                       |  |
|-----------------------|--|
| By phone,<br>WhatsApp |  |
| By email              |  |

8) When you talk to this person, are there usually other people in the conversation?

Yes

No

9) If you contact them in person, where do you typically talk with him/her (choose one, the most common)?

|                                      |  |
|--------------------------------------|--|
| At my home                           |  |
| At their home                        |  |
| On the street                        |  |
| In a bar                             |  |
| At the fishing association           |  |
| Other (write the name of the place): |  |

i. Mark the answer (only one) that you think is most appropriate:

\*1. Marine forests of gorgonians, *Posidonia*, and corals:

- a) are not affected by ship anchors or fishing nets
- b) are heavily affected by anchors and fishing nets, one of the reasons why fish stocks are decreasing
- c) are significantly affected by anchors and fishing nets, but this does not affect the quantity of fish caught
- d) are affected by fishing nets but not by ship anchors

\*2. What is *Posidonia*?

- a) an animal
- b) a marine plant
- c) an alga
- d) a mineral structure

\*3) *Posidonia*:

- a) is not important as a habitat for numerous commercial species
- b) currently has increasing populations from recent years
- c) protects the coastline and is an important habitat
- d) damages the coastline with leaves that reach the beaches

\*4) What is a gorgonian?

- a) an animal
- b) a marine plant
- c) an alga
- d) a mineral structure

\*5) Why are gorgonians important in the sea?

- a) they create habitat within the sea and offer protection to other organisms
- b) they serve as food for most fish
- c) they are mainly ornamental, very attractive to divers
- d) they help consolidate sediment, like *Posidonia*

\*6) If you return gorgonians directly to the sea after catching them in the nets...

- a) there is a good chance they will stand up and recover
- b) it is very difficult for them to survive and thrive
- c) they will not reach the bottom because they will be eaten by fish
- d) they only need a small piece of rock attached to survive on the seabed

\*7) When we talk about gorgonians forming communities, we mean that, among other things, they are:

- a) important breeding habitats for various fish and invertebrates
- b) dirty areas of the sea
- c) unimportant breeding habitats for various fish and invertebrates
- d) unimportant breeding areas when compared to *Posidonia*

\*8) Conserving underwater gorgonian forests:

- a) usually leads to more catches in the long run and is beneficial for marine life
- b) usually results in fewer catches in the long run but is beneficial for marine life

## Supplementary Material

- c) usually has no effect on future fishing activity or marine life
- d) usually has no effect on future fishing activity and can harm marine life

\*9) In recent years, many populations of commercially valuable fish:

- a) have significantly decreased
- b) have significantly increased
- c) have not changed much
- d) have decreased but not significantly

\*10) In general, in recent years, the size of the fish catches:

- a) has significantly decreased
- b) has significantly increased
- c) has not changed much
- d) has decreased slightly, but not significantly

\*11) Of the gorgonians that are returned to the sea with scientists:

- a) many of them survive
- b) not many of them survive
- c) most of them are found back in the nets
- d) most of them are eaten by fish

\*12) Small-scale fishing:

- a) does not harm gorgonian forests
- b) harms gorgonian forests but the impact can be minimized with good practices
- c) harms gorgonian forests and there is nothing that can be done to minimize the impact
- d) promotes the expansion of gorgonian forests

\*13) Why is it important to return gorgonians attached to a stone to the sea?

- a) to make them stand up and thus favor their survival
- b) because it is more difficult for them to get caught in the nets
- c) because we want to create a more rocky seabed
- d) to identify them

\*14) What has been the main gain from participating in the projects you have been involved in?

- a) working with biologists
- b) receiving financial contributions
- c) reducing the impact of fishing as requested by the authorities
- d) collaboration in the conservation and restoration of the marine environment

\*15) What would you propose to reduce the impact of trammel nets on gorgonians?

- a) since there is little impact, there is no need to change anything
- b) reducing the size of the net and the time it is set
- c) changing the net collection system
- d) changing the fishing gear

16) Collecting and recovering gorgonians during fishing...

- a) has required work but has been worth the effort
- b) has involved a lot of extra work
- c) has caused many logistical problems during the fishing day
- d) has been easier than I thought

17) For fishers, working with biologists...

- a) is positive in the short term but negative in the long term
- b) is generally positive
- c) is a complication
- d) is a way to share knowledge

18) What has been the main benefit of viewing, along with scientists, the videos from the trawl nets recorded by the ROV?

- a) there has been no benefit
- b) it was fun but did not provide me with new information
- c) getting to know the seabeds where we work and understanding the impacts of fishing
- d) I have discovered a possible new source of income

19) Participating in the project:

- a) has improved our relationships as small-scale fishers
- b) has generated conflicts among us and with other marine sectors
- c) has given greater visibility to our work as small-scale fishers at the Natural Park
- d) has empowered us as a group in relation to other sectors (divers, recreational fishers, government...)

20) Which option would you choose?

- a) I would recommend other fishers to participate in projects like this, but I would not like to continue participating in similar projects; I have had enough.
- b) I would recommend other fishers to participate in projects like this, and I would like to continue participating in similar projects.
- c) I would not recommend other fishers to participate in projects like this, and I would not like to continue participating in similar projects.
- d) I think the conditions need to be changed to be able to recommend and participate in similar projects.

\*21) From now on, if I find gorgonians in the nets...

## Supplementary Material

- a) I will return them to the sea if they have sufficient rocky support
- b) I will return all of them to the sea
- c) I will try to remove as few as possible, and if I do, I will return them to the sea if they have sufficient rocky support
- d) I will clean the nets when I return to port

22) Did you know about gorgonians before the project? How did you know about them? Provide an example of what was done with gorgonians (e.g., eating them, drying them, using them for ornamental purposes, or doing nothing with them).

23) Would you like to add anything else?

i. Indicate whether you agree (Yes) or disagree (No) with the following statements. If you want to clarify something, you can write it in the space provided for each statement:

\* 24) Posidonia is important as a habitat for numerous commercial species.

Yes    No

Comment:

\* 25) *Posidonia* protects the coastline.

Yes No

Comment:

\* 26) *Posidonia* has been declining for years.

Yes No

Comment:

\* 27) Lobster populations have increased in recent years.

Yes No

Comment:

\* 28) Scorpionfish populations have increased in recent years.

Yes No

Comment:

\* 29) Cuttlefish populations have increased in recent years.

Yes No

Comment:

\* 30) The size of caught fish has decreased over the last ten years.

Yes No

Comment:

\* 31) The size of captured lobsters has been decreasing in the last 10 years.

Yes No

Comment:

\* 32) Groupers are generally smaller than they were ten years ago.

Yes No

Comment:

\* 33) There are fewer octopuses than before.

Yes No

Comment:

\* 34) Fish species that have no commercial value have increased their populations.

## Supplementary Material

Yes No

Comment:

\* 35) There are fewer fish in the trawl nets of the Cap de Creus PN.

Yes No

Comment:

\* 36) The protected area helps to fish more around it.

Yes No

Comment:

\* 37) There are more large specimens outside the protected area than inside.

Yes No

Comment:

\* 38) Spearfishing has damaged the ecosystem.

Yes No

Comment:

\* 39) Noise pollution drives away fish.

Yes No

Comment:

\* 40) Pollution leads to less *Posidonia*.

Yes No

Comment:

\* 41) Gorgonian forests are important to prevent fish populations from declining.

Yes No

Comment:

\* 42) Gorgonians that are directly returned to the sea survive.

Yes No

Comment:

\* 43) *Posidonia*, gorgonians, and corals have similar habitat-creating functions in the ecosystem.

Yes No

Comment:

44) I fish differently than I did five years ago.

Yes No

Comment:

45) There are little-known fish species that could be sold and consumed more.

Yes No

Comment:

\* 46) Protecting seagrass, gorgonians, and corals protects trawl nets.

Yes No

Comment:

\* 47) Fishing closures are usually respected.

Yes No

Comment:

\* 48) Minimum catch sizes are usually respected.

Yes No

Comment:

\* 49) Gillnets destroy habitats and ultimately lead to fewer fish.

Yes No

Comment:

\* 50) Small-scale fishers can contribute to ecosystem recovery.

Yes No

Comment:

51) People have a negative image of fishers in general.

Yes No

Comment:

52) People value small-scale fishers positively compared to industrial fishing.

Yes No

Comment:

## Supplementary Material

53) It is necessary to explain to schools and the public how certain types of fishing can be more environmentally friendly.

Yes No

Comment:

**Supplementary Table 2.** Full survey used for compelling the data for PNA, OL assessment and CCA. OL questions used for CCA are indicated with an asterisk.

| Number of Question |   | Number of answers by fishers |
|--------------------|---|------------------------------|
| <b>1</b>           | a | 0                            |
|                    | b | 4                            |
|                    | c | 4                            |
|                    | d | 1                            |
| <b>2</b>           | a | 0                            |
|                    | b | 5                            |
|                    | c | 4                            |
|                    | d | 0                            |
| <b>3</b>           | a | 0                            |
|                    | b | 0                            |
|                    | c | 9                            |
|                    | d | 0                            |
| <b>4</b>           | a | 4                            |
|                    | b | 4                            |
|                    | c | 0                            |
|                    | d | 1                            |
| <b>5</b>           | a | 8                            |
|                    | b | 1                            |
|                    | c | 0                            |
|                    | d | 0                            |
| <b>6</b>           | a | 1                            |
|                    | b | 7                            |
|                    | c | 0                            |

|           |   |   |
|-----------|---|---|
|           | d | 1 |
| <b>7</b>  | a | 9 |
|           | b | 0 |
|           | c | 0 |
|           | d | 0 |
| <b>8</b>  | a | 9 |
|           | b | 0 |
|           | c | 0 |
|           | d | 0 |
| <b>9</b>  | a | 6 |
|           | b | 0 |
|           | c | 1 |
|           | d | 2 |
| <b>10</b> | a | 5 |
|           | b | 1 |
|           | c | 3 |
|           | d | 0 |
| <b>11</b> | a | 9 |
|           | b | 0 |
|           | c | 0 |
|           | d | 0 |
| <b>12</b> | a | 0 |
|           | b | 9 |
|           | c | 0 |
|           | d | 0 |
| <b>13</b> | a | 9 |
|           | b | 0 |
|           | c | 0 |
|           | d | 0 |
| <b>14</b> | a | 2 |
|           | b | 1 |
|           | c | 6 |
|           | d | 0 |
| <b>15</b> | a | 5 |
|           | b | 2 |

# Supplementary Material

|           |                                                                                                          |   |
|-----------|----------------------------------------------------------------------------------------------------------|---|
|           | c                                                                                                        | 0 |
|           | d                                                                                                        | 1 |
| <b>16</b> | a                                                                                                        | 3 |
|           | b                                                                                                        | 2 |
|           | c                                                                                                        | 0 |
|           | d                                                                                                        | 4 |
| <b>17</b> | a                                                                                                        | 1 |
|           | b                                                                                                        | 4 |
|           | c                                                                                                        | 0 |
|           | d                                                                                                        | 4 |
| <b>18</b> | a                                                                                                        | 0 |
|           | b                                                                                                        | 0 |
|           | c                                                                                                        | 9 |
|           | d                                                                                                        | 0 |
| <b>19</b> | a                                                                                                        | 1 |
|           | b                                                                                                        | 0 |
|           | c                                                                                                        | 5 |
|           | d                                                                                                        | 3 |
| <b>20</b> | a                                                                                                        | 0 |
|           | b                                                                                                        | 8 |
|           | c                                                                                                        | 0 |
|           | d                                                                                                        | 1 |
| <b>21</b> | a                                                                                                        | 2 |
|           | b                                                                                                        | 2 |
|           | c                                                                                                        | 5 |
|           | d                                                                                                        | 0 |
| <b>22</b> | I knew about them but nothing was done with them                                                         | 1 |
|           | I didn't know much about them and their ecological role                                                  | 1 |
|           | I knew about them from scuba diving                                                                      | 1 |
|           | I knew about them, I put them back in the water, sometimes I used some specimens for ornamental purposes | 1 |

|           |                                                                                                                         |   |
|-----------|-------------------------------------------------------------------------------------------------------------------------|---|
| <b>23</b> | I am glad to have had the opportunity to learn so much from biologists                                                  | 1 |
|           | The decrease of fish is caused by sportive fishing                                                                      | 1 |
|           | I am glad to have had the opportunity to work with biologists but I am aware that they use to restrict fishing activity | 1 |
| <b>24</b> | No                                                                                                                      | 0 |
|           | Yes                                                                                                                     | 9 |
| <b>25</b> | No                                                                                                                      | 0 |
|           | Yes                                                                                                                     | 9 |
| <b>26</b> | No                                                                                                                      | 2 |
|           | Yes                                                                                                                     | 7 |
| <b>27</b> | No                                                                                                                      | 5 |
|           | Yes                                                                                                                     | 4 |
| <b>28</b> | No                                                                                                                      | 5 |
|           | Yes                                                                                                                     | 4 |
| <b>29</b> | No                                                                                                                      | 6 |
|           | Yes                                                                                                                     | 3 |
| <b>30</b> | No                                                                                                                      | 4 |
|           | Yes                                                                                                                     | 5 |
| <b>31</b> | No                                                                                                                      | 4 |
|           | Yes                                                                                                                     | 5 |
| <b>32</b> | No                                                                                                                      | 4 |
|           | Yes                                                                                                                     | 5 |
| <b>33</b> | No                                                                                                                      | 8 |
|           | Yes                                                                                                                     | 1 |
| <b>34</b> | No                                                                                                                      | 8 |
|           | Yes                                                                                                                     | 1 |
| <b>35</b> | No                                                                                                                      | 5 |
|           | Yes                                                                                                                     | 4 |
| <b>36</b> | No                                                                                                                      | 1 |
|           | Yes                                                                                                                     | 6 |
| <b>37</b> | No                                                                                                                      | 5 |
|           | Yes                                                                                                                     | 2 |

# Supplementary Material

|           |     |   |
|-----------|-----|---|
| <b>38</b> | No  | 2 |
|           | Yes | 7 |
| <b>39</b> | No  | 1 |
|           | Yes | 7 |
| <b>40</b> | No  | 2 |
|           | Yes | 7 |
| <b>41</b> | No  | 0 |
|           | Yes | 9 |
| <b>42</b> | No  | 2 |
|           | Yes | 6 |
| <b>43</b> | No  | 1 |
|           | Yes | 8 |
| <b>44</b> | No  | 3 |
|           | Yes | 6 |
| <b>45</b> | No  | 1 |
|           | Yes | 8 |
| <b>46</b> | No  | 0 |
|           | Yes | 9 |
| <b>47</b> | No  | 0 |
|           | Yes | 9 |
| <b>48</b> | No  | 0 |
|           | Yes | 9 |
| <b>49</b> | No  | 0 |
|           | Yes | 9 |
| <b>50</b> | No  | 2 |
|           | Yes | 7 |
| <b>51</b> | No  | 0 |
|           | Yes | 9 |
| <b>52</b> | No  | 3 |
|           | Yes | 6 |
| <b>53</b> | No  | 1 |
|           | Yes | 8 |

|    |     |   |
|----|-----|---|
| 54 | No  | 0 |
|    | Yes | 9 |

**Supplementary Table 3.** Results of the OL survey conducted with small-scale fishers in Cap de Creus MPA. Results include the answers provided by the son of one of the fishers, who despite not participating formally, also participated in the project since the beginning and agreed to answer the OL test. Some of the questions were not answered by all of the fishers.
